# Supplementary material
Source: PubMed Central journal article supplement (PMC3320256)
Supplement: supp_en.2011-1831_EN-11-1831SuppTable_1.pdf [file supp_en.2011-1831_EN-11-1831SuppTable_1.pdf]

**Supplemental** Table 1. Quantitation of microCT data from the femoral midshaft.

| Parameters               | WT           | Hyp                       |                            |
|--------------------------|--------------|---------------------------|----------------------------|
|                          | Vehicle      | Vehicle                   | PD0325901                  |
| Cortical Bone Volume (%) | 0.45 ± 0.01  | 0.27 ± 0.003 <sup>#</sup> | 0.31 ± 0.005 <sup>**</sup> |
| Cortical Thickness (mm)  | 0.19 ± 0.003 | 0.09 ± 0.002 <sup>#</sup> | 0.11 ± 0.003 <sup>**</sup> |
| Cortical Porosity        | 0.52 ± 0.01  | 0.83 ± 0.04 <sup>#</sup>  | 0.70 ± 0.02 <sup>**</sup>  |
| Femur Length (mm)        | 15.89 ± 0.05 | 11.21 ± 0.36 <sup>#</sup> | 11.79 ± 0.15               |

Results are expressed as mean ± SEM. n=3 mice per group. <sup>#</sup>*P*<0.05, compared to WT mice treated with vehicle; <sup>\*\*</sup>*P*<0.05, compared to *Hyp* mice treated with vehicle.
